# Supplementary material
Source: publisher figshare collection journal article supplement (https://sage.figshare.com/ndownloader/files/13627547)
Supplement: Supplementary file 1 [file 13627547]

**APPENDIX 1. Knowledge of financial issues**

|                                                              | Students in<br>2014 | Students in<br>2015 | Students in<br>2017 | Population of<br>Estonia in the<br>2015 OECD<br>survey<br>(n=1,125) |
|--------------------------------------------------------------|---------------------|---------------------|---------------------|---------------------------------------------------------------------|
| knows the concept of<br>compound interest                    | 11/12 (92%)         | 12/19 (63%)         | 10/12 (83%)         | 43%                                                                 |
| calculates simple interest<br>correctly                      | 10/12 (83%)         | 15/19 (79%)         | 12/12 (100%)        | 79%                                                                 |
| knows what inflation<br>means                                | NA                  | 15/19 (79%)         | 10/12 (83%)         | 87%                                                                 |
| understands the need for<br>diversifying investment<br>risks | 9/12 (75%)          | 13/19 (68%)         | 11/12 (92%)         | 65%                                                                 |

Sources: surveys conducted by the author, OECD 2014a, 2016, Saar Poll 2015.

## **APPENDIX 2. Statements in the first student questionnaire, in 2015 and 2017.**

Responses are on five-point scale, where 1=*completely agree* and 5=*completely disagree*.

(OECD 2014b)

- a. Before I buy something I carefully consider whether I can afford it
- b. I tend to live for today and let tomorrow take care of itself
- c. I find it more satisfying to spend money than to save it for the long term
- d. I pay my bills on time
- e. I am prepared to risk some of my own money when saving or making an investment
- f. I keep a close personal watch on my financial affairs
- g. I set long term financial goals and strive to achieve them
- h. Money is there to be spent
- i. My financial situation limits my ability to do the things that are important to me
- j. I tend to worry about paying my normal living expenses
- k. I have too much debt right now
- l. I am satisfied with my present financial situation

### APPENDIX 3. Card for selecting a goal on the ferry (in Estonian)

**Pealehakkamine on pool võitu!**

Mõtle, milline eesmärk võiks Sinule ja Su perele olla lähima paari kuu jooksul oluline? Tee selle juurde ristike ja täida variandi lüngad.

☐ Koguda ..... /ostunimi/ jaoks ..... /kuupäevaks/ ..... eurot.

☐ Vähendada igakuiseid väljaminekuid ..... euro võrra.

☐ Suurendada igakuiseid sissetulekuid ..... euro võrra.

☐ Omavahel rahaasjad läbi arutada, räägin ..... /kuupäev/ oma lähedastega meiekuludest, tuludest ja eesmärkidest.

☐ Saada kulud kontrolli alla. Selleks koostame ..... /perioodi/ eelarve. Kasutada saame näiteks minuraha.ee või internetipanga eelarve vorme.

☐ Võlgadest vabaneda ..... /kuupäev/.

☐ Saada pilt ette kõigist oma kohustustest ja kasutatavatest finantsteenustest. Selleks vaatame oma lepingute tingimused ..... /kuupäev/ üle.

☐ Uurida võimalusi raha kogumiseks ja investeerimiseks, vaatan ..... /kuupäev/ näiteks erapooletust tarbijaveebist minuraha.ee, millised võimalused mul üldse on.

**APPENDIX 4. Form of the action plan for the early-stage entrepreneurs** (handed out on the 4<sup>th</sup> of May)

**My steps towards a more financially-secured life**

**My goal by the 29th of May is to:**

For achieving it I **will do:**

TODAY

FOR NEXT WEDNESDAY (10.05)

FOR THE WEDESNDAY AFTER THAT (17.05)

BY THE 29TH OF MAY

**I will help** ..... (name of the team member) to achieve his/her goal; for that I will remind him/her on the next Wednesday and the Wednesday after that of what he/she promised to change in his/her finances and advise him/her on achieving it. His/her contacts:

For giving advice, see:

/list of impartial websites, books, blogs and tools in Estonian; e-mail address of the lecturer/
